# Supplementary material for: Systemic antibiotic prophylaxis does not affect infectious complications in pediatric burn injury: A meta-analysis
Source: PubMed Central journal article supplement (PMC6760783; doi:10.1371/journal.pone.0223063), 2019-09-25
Supplement: pone.0223063.s001.pdf [file pone.0223063.s001.pdf]

## Supporting information

**Table A.** PRISMA checklist.

| Section/topic                      | #  | Checklist item                                                                                                                                                                                                                                                                                              | Reported on page # |
|------------------------------------|----|-------------------------------------------------------------------------------------------------------------------------------------------------------------------------------------------------------------------------------------------------------------------------------------------------------------|--------------------|
| <b>TITLE</b>                       |    |                                                                                                                                                                                                                                                                                                             |                    |
| Title                              | 1  | Identify the report as a systematic review, meta-analysis, or both.                                                                                                                                                                                                                                         | 1                  |
| <b>ABSTRACT</b>                    |    |                                                                                                                                                                                                                                                                                                             |                    |
| Structured summary                 | 2  | Provide a structured summary including, as applicable: background; objectives; data sources; study eligibility criteria, participants, and interventions; study appraisal and synthesis methods; results; limitations; conclusions and implications of key findings; systematic review registration number. | 2                  |
| <b>INTRODUCTION</b>                |    |                                                                                                                                                                                                                                                                                                             |                    |
| Rationale                          | 3  | Describe the rationale for the review in the context of what is already known.                                                                                                                                                                                                                              | 3-4                |
| Objectives                         | 4  | Provide an explicit statement of questions being addressed with reference to participants, interventions, comparisons, outcomes, and study design (PICOS).                                                                                                                                                  | 4                  |
| <b>METHODS</b>                     |    |                                                                                                                                                                                                                                                                                                             |                    |
| Protocol and registration          | 5  | Indicate if a review protocol exists, if and where it can be accessed (e.g., Web address), and, if available, provide registration information including registration number.                                                                                                                               | 5                  |
| Eligibility criteria               | 6  | Specify study characteristics (e.g., PICOS, length of follow-up) and report characteristics (e.g., years considered, language, publication status) used as criteria for eligibility, giving rationale.                                                                                                      | 5                  |
| Information sources                | 7  | Describe all information sources (e.g., databases with dates of coverage, contact with study authors to identify additional studies) in the search and date last searched.                                                                                                                                  | 5                  |
| Search                             | 8  | Present full electronic search strategy for at least one database, including any limits used, such that it could be repeated.                                                                                                                                                                               | 5                  |
| Study selection                    | 9  | State the process for selecting studies (i.e., screening, eligibility, included in systematic review, and, if applicable, included in the meta-analysis).                                                                                                                                                   | 6                  |
| Data collection process            | 10 | Describe method of data extraction from reports (e.g., piloted forms, independently, in duplicate) and any processes for obtaining and confirming data from investigators.                                                                                                                                  | 6                  |
| Data items                         | 11 | List and define all variables for which data were sought (e.g., PICOS, funding sources) and any assumptions and simplifications made.                                                                                                                                                                       | 6                  |
| Risk of bias in individual studies | 12 | Describe methods used for assessing risk of bias of individual studies (including specification of whether this was done at the study or outcome level), and how this information is to be used in any data synthesis.                                                                                      | 6                  |
| Summary measures                   | 13 | State the principal summary measures (e.g., risk ratio, difference in means).                                                                                                                                                                                                                               | 6-7                |

|                               |    |                                                                                                                                                                                                          |                      |
|-------------------------------|----|----------------------------------------------------------------------------------------------------------------------------------------------------------------------------------------------------------|----------------------|
| Synthesis of results          | 14 | Describe the methods of handling data and combining results of studies, if done, including measures of consistency (e.g., $I^2$ ) for each meta-analysis.                                                | 7                    |
| Risk of bias across studies   | 15 | Specify any assessment of risk of bias that may affect the cumulative evidence (e.g., publication bias, selective reporting within studies).                                                             | 7                    |
| Additional analyses           | 16 | Describe methods of additional analyses (e.g., sensitivity or subgroup analyses, meta-regression), if done, indicating which were pre-specified.                                                         | 7                    |
| <b>RESULTS</b>                |    |                                                                                                                                                                                                          |                      |
| Study selection               | 17 | Give numbers of studies screened, assessed for eligibility, and included in the review, with reasons for exclusions at each stage, ideally with a flow diagram.                                          | 7; Figure 1          |
| Study characteristics         | 18 | For each study, present characteristics for which data were extracted (e.g., study size, PICOS, follow-up period) and provide the citations.                                                             | 8; Figure 1; Table D |
| Risk of bias within studies   | 19 | Present data on risk of bias of each study and, if available, any outcome level assessment (see item 12).                                                                                                | 6; Tables B and C    |
| Results of individual studies | 20 | For all outcomes considered (benefits or harms), present, for each study: (a) simple summary data for each intervention group (b) effect estimates and confidence intervals, ideally with a forest plot. | 7-11; Figures 2-5    |
| Synthesis of results          | 21 | Present results of each meta-analysis done, including confidence intervals and measures of consistency.                                                                                                  | 7-11                 |
| Risk of bias across studies   | 22 | Present results of any assessment of risk of bias across studies (see Item 15).                                                                                                                          | 6; Figures A and B   |
| Additional analysis           | 23 | Give results of additional analyses, if done (e.g., sensitivity or subgroup analyses, meta-regression [see Item 16]).                                                                                    | 9-11                 |
| <b>DISCUSSION</b>             |    |                                                                                                                                                                                                          |                      |
| Summary of evidence           | 24 | Summarize the main findings including the strength of evidence for each main outcome; consider their relevance to key groups (e.g., healthcare providers, users, and policy makers).                     | 11-14                |
| Limitations                   | 25 | Discuss limitations at study and outcome level (e.g., risk of bias), and at review-level (e.g., incomplete retrieval of identified research, reporting bias).                                            | 14-15                |
| Conclusions                   | 26 | Provide a general interpretation of the results in the context of other evidence, and implications for future research.                                                                                  | 15                   |
| <b>FUNDING</b>                |    |                                                                                                                                                                                                          |                      |
| Funding                       | 27 | Describe sources of funding for the systematic review and other support (e.g., supply of data); role of funders for the systematic review.                                                               | Submitted separately |

**Table B.** Risk of bias assessment of a randomized controlled trial included in the meta-analysis using the Cochrane Risk of Bias Tool for Randomized Controlled Trials.

**Chahed 2014**

|                                                                                   |                                                           |
|-----------------------------------------------------------------------------------|-----------------------------------------------------------|
|  | Random sequence generation (selection bias)               |
|  | Allocation concealment (selection bias)                   |
|  | Blinding of participants and personnel (performance bias) |
|  | Blinding of outcome assessment (detection bias)           |
|  | Incomplete outcome data addressed (attrition bias)        |
|  | Selective reporting (reporting bias)                      |

According to the Cochrane Risk of Bias Tool, the study is considered overall as poor quality, for two of the points were determined as “potentially high risk of bias”.

 , low risk;  , high risk;  , unclear risk of bias.

**Table C.** Quality assessment of the studies included in the meta-analysis using the Newcastle-Ottawa Scale. A score of 7 to 9 indicates a good, a score of 4 to 6 a fair, and a score of 0 to 3 a low methodological quality.

|             |      | Representativeness of the exposed cohort | Selection of the non-exposed cohort | Ascertainment of the therapy | Demonstration that outcome of interest was not present at start of study | Comparability of cohorts on the basis of the design or analysis controlled for confounders | Assessment of outcome | Was follow-up long enough for outcomes to occur | Adequacy of follow-up of cohorts |         |              |
|-------------|------|------------------------------------------|-------------------------------------|------------------------------|--------------------------------------------------------------------------|--------------------------------------------------------------------------------------------|-----------------------|-------------------------------------------------|----------------------------------|---------|--------------|
| Ergün O     | 2003 | *                                        | *                                   | *                            | *                                                                        | *                                                                                          | *                     | *                                               |                                  | 7 stars | Good quality |
| Sheridan RL | 2001 | *                                        |                                     | *                            |                                                                          | *                                                                                          | *                     | *                                               |                                  | 5 stars | Fair quality |
| Rosanova MT | 2013 | *                                        | *                                   | *                            | *                                                                        | *                                                                                          | *                     | *                                               | *                                | 8 stars | Good quality |
| Mulgrew S   | 2014 | *                                        | *                                   | *                            | *                                                                        | *                                                                                          | *                     | *                                               |                                  | 7 stars | Good quality |
| Rashid A    | 2005 | *                                        | *                                   | *                            |                                                                          | *                                                                                          | *                     | *                                               |                                  | 6 stars | Fair quality |

**Table D.** Summary of study characteristics for publications included in the meta-analyses.

| First author (year) | Country   | Country income level | Antibiotic-treated / non-treated patients (n) | Local / systemic / all infectious complications (n) |             | Age range (years) | Mean injured TBSA (%) | Depth of burn                 | Duration of antibiotic treatment (days) |
|---------------------|-----------|----------------------|-----------------------------------------------|-----------------------------------------------------|-------------|-------------------|-----------------------|-------------------------------|-----------------------------------------|
|                     |           |                      |                                               | Antibiotic-treated                                  | Non-treated |                   |                       |                               |                                         |
| Sheridan (2001)     | USA       | High                 | 511/406                                       | 3/NR/3                                              | 4/NR/4      | 0-16              | 11-12                 | Superficial                   | 3                                       |
| Ergun (2004)        | Turkey    | Middle               | 47/30                                         | 10/7/17                                             | 5/1/6       | 0-16              | 10-18                 | Superficial to full thickness | NR                                      |
| Rashid (2005)       | UK        | High                 | 39/11                                         | NR/2/2                                              | NR/1/1      | 0-12              | 6                     | Partial to full thickness     | 1                                       |
| Rosanova (2013)     | Argentina | High                 | 92/18                                         | NR/NR/79                                            | NR/NR/5     | 0-2               | 27*                   | Superficial to deep           | NR                                      |
| Chahed (2014)       | Tunisia   | Middle               | 45/35                                         | NR/NR/8                                             | NR/NR/8     | 0.8-8             | 27                    | Second to third degree        | NR                                      |
| Mulgrew (2014)      | UK        | High                 | 183/318                                       | NR/8/8                                              | NR/NR/26    | 0-5               | 7                     | NR                            | 5                                       |

NR, not reported; TBSA, total body surface area; \*median of injured TBSA

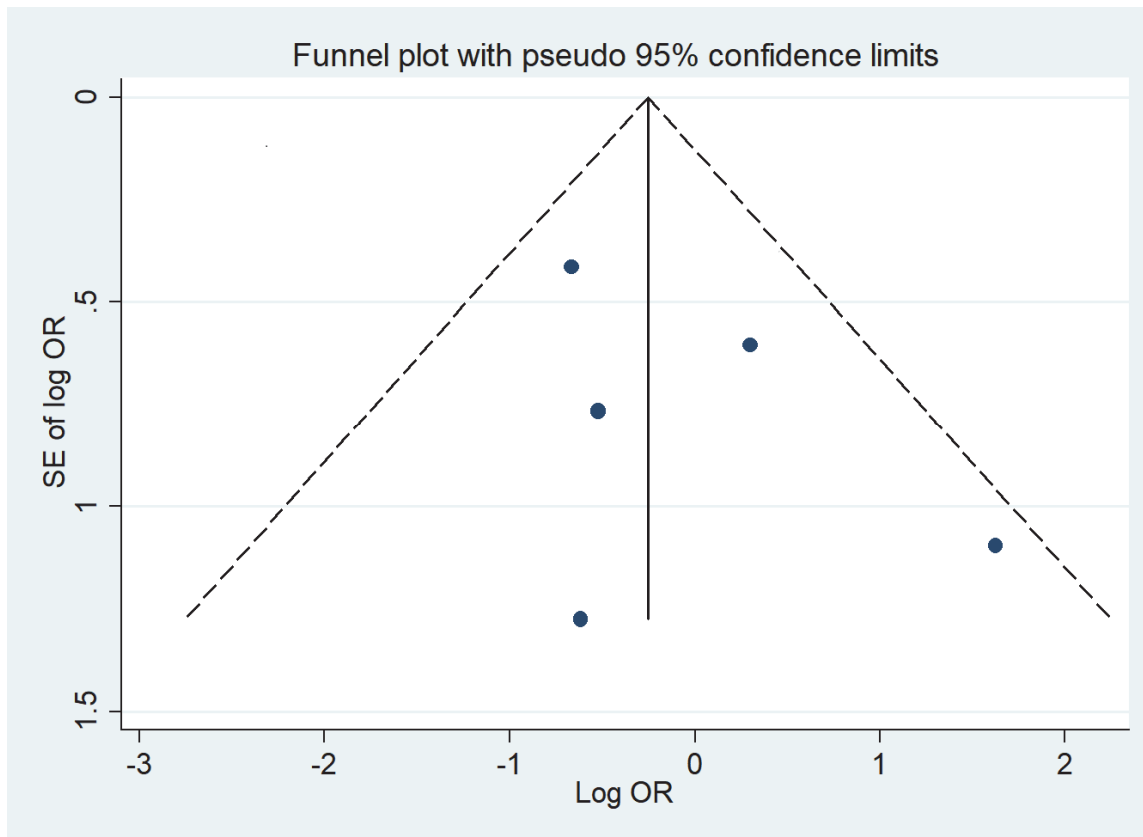

**Figure A.** Funnel plot of the studies that were included in the forest plot of the odds ratios (ORs) for systemic and local subgroups of infectious complications in children with burn injuries who received systemic antibiotic prophylaxis compared to those who did not.

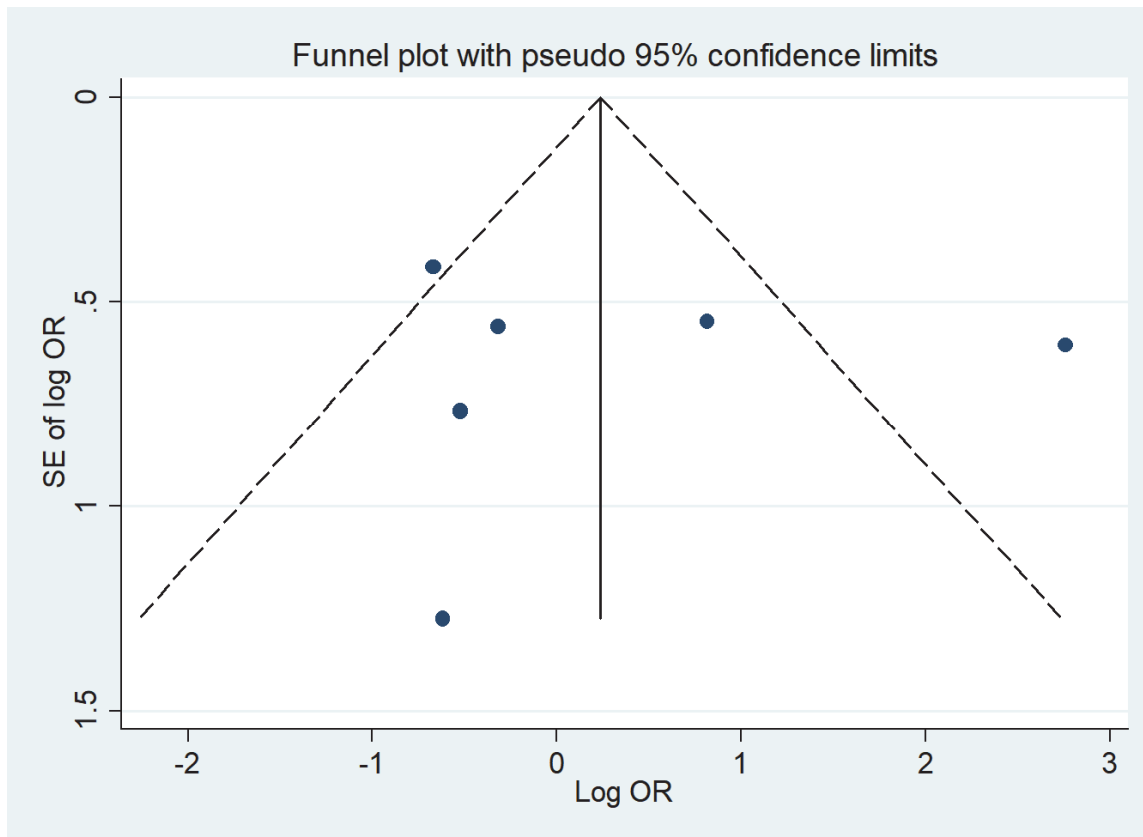

**Figure B.** Funnel plot of the studies that were included in the forest plot of the odds ratios (ORs) for all infectious complications in children with burn injuries who received versus those who did not receive systemic antibiotic prophylaxis in the age, TBSA, and country income level subgroups.
